# Supplementary material for: A Cardiovascular Disease Risk Score Model Based on High Contribution Characteristics
Source: MDPI journal article supplement (doi:10.3390/app13020893), 2023-01-09
Supplement: s1 [file s1]

**Supplementary table S1.** Baseline characteristics of patients

| Variables             | Overall      | Normal       | CVD          | P-value |
|-----------------------|--------------|--------------|--------------|---------|
|                       | n=70000      | n=35021      | n=34979      |         |
| <b>age</b>            | 53.34(6.77)  | 51.73(6.79)  | 54.95(6.35)  | <0.001  |
| <b>gender=2(%)</b>    | 24470(35.0)  | 12107(34.6)  | 12363(35.3)  | 0.033   |
| <b>height</b>         | 165[159,170] | 165[159,170] | 165[159,170] | 0.001   |
| <b>weight</b>         | 74.21(14.40) | 71.59(13.31) | 76.82(14.96) | <0.001  |
| <b>ap_hi</b>          | 120[120,140] | 120[110,120] | 130[120,140] | <0.001  |
| <b>ap_lo</b>          | 80[80,90]    | 80[70,80]    | 80[80,90]    | <0.001  |
| <b>cholesterol(%)</b> |              |              |              | <0.001  |
| <b>1</b>              | 52385(74.8)  | 29330(83.7)  | 23055(65.9)  |         |
| <b>2</b>              | 9549(13.6)   | 3799(10.8)   | 5750(16.4)   |         |
| <b>3</b>              | 8066(11.5)   | 1892(5.4)    | 6174(17.7)   |         |
| <b>gluc(%)</b>        |              |              |              | <0.001  |
| <b>1</b>              | 59479(85.0)  | 30894(88.2)  | 28585(81.7)  |         |
| <b>2</b>              | 5190(7.4)    | 2112(6.0)    | 3078(8.8)    |         |
| <b>3</b>              | 5331(7.6)    | 2015(5.8)    | 3316(9.5)    |         |
| <b>smoke=1(%)</b>     | 6169(8.8)    | 3240(9.3)    | 2929(8.4)    | <0.001  |
| <b>alco=1(%)</b>      | 3764(5.4)    | 1941(5.5)    | 1823(5.2)    | 0.055   |
| <b>active=1(%)</b>    | 56261(80.4)  | 28643(81.8)  | 27618(79.0)  | <0.001  |
